# Supplementary material for: Genome-wide methylation patterns predict clinical benefit of immunotherapy in lung cancer
Source: PubMed Central journal article supplement (PMC7410160; doi:10.1186/s13148-020-00907-4), 2020-08-06

IRF6

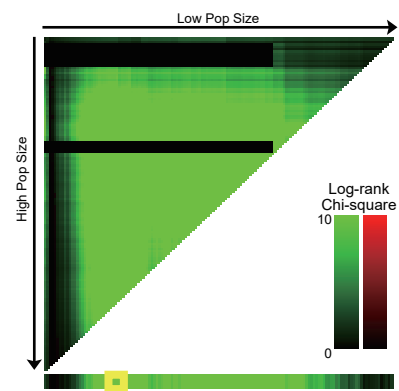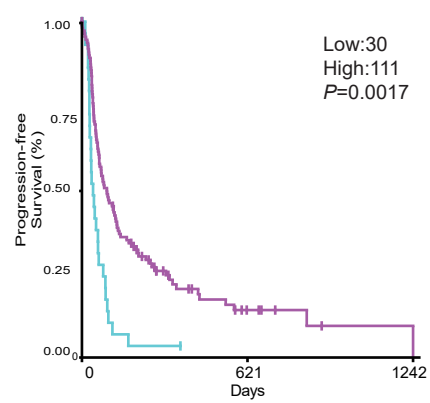

TRIM36

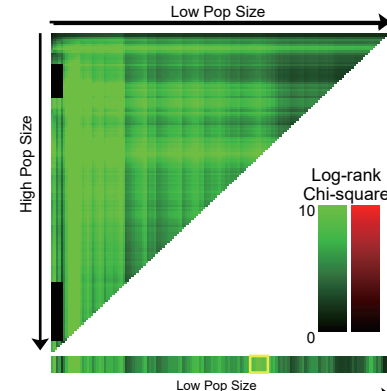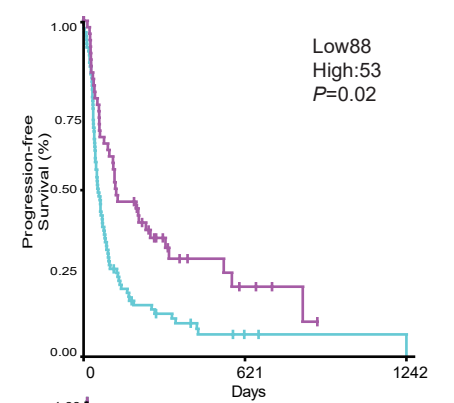

CTSD

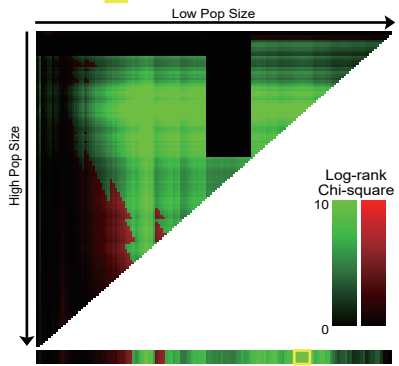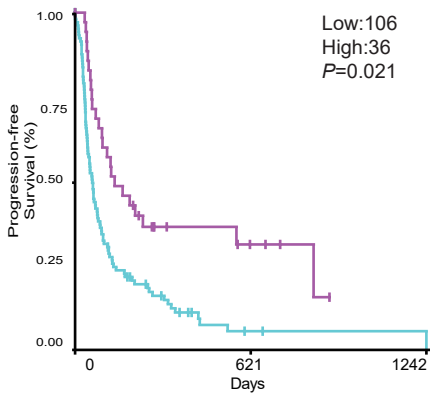

EVL

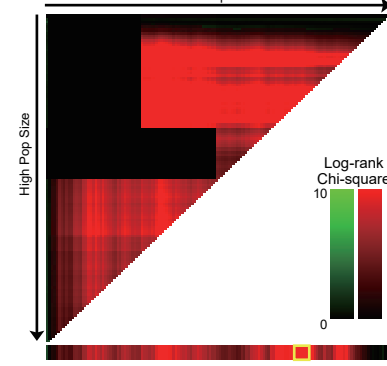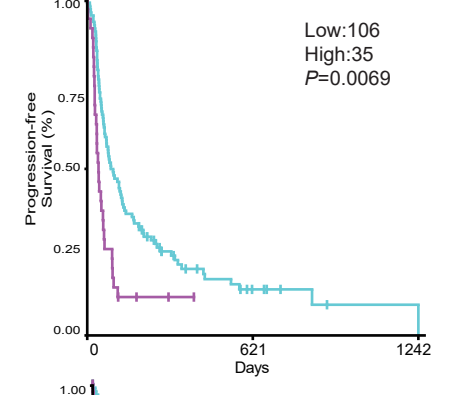

GRN

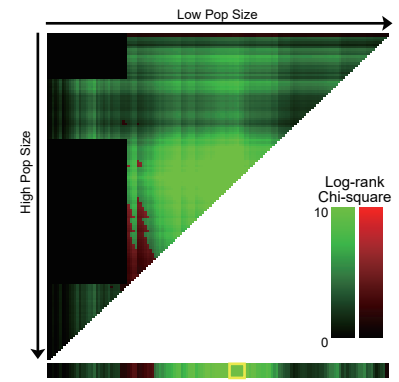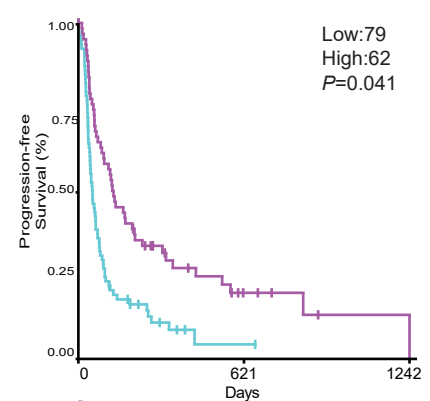

CD3E

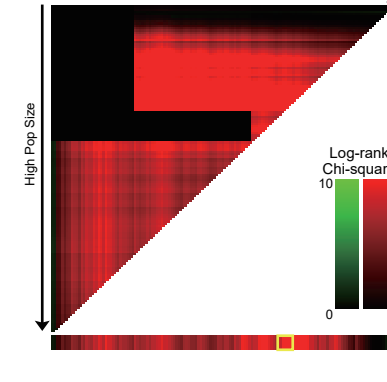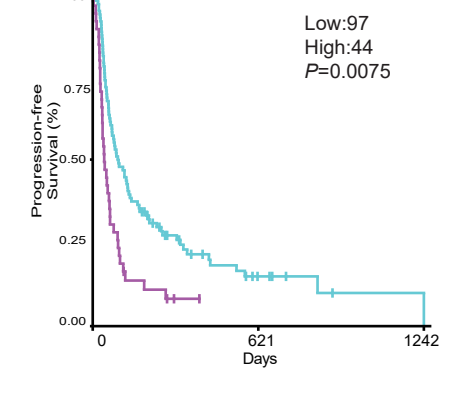

LTBR

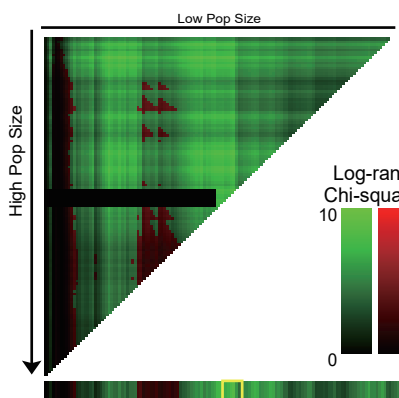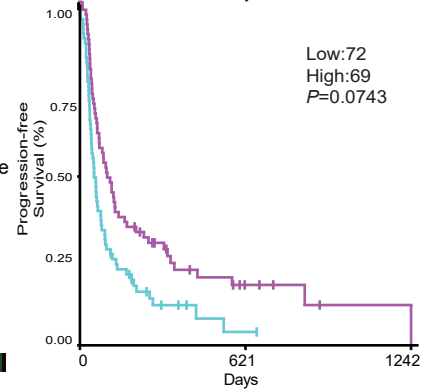

LCP1

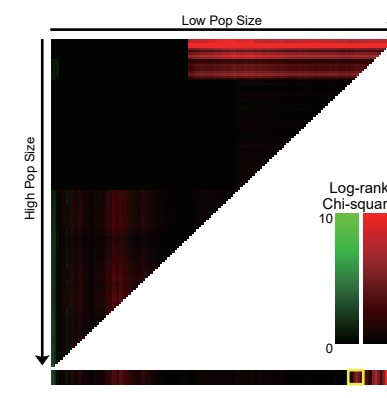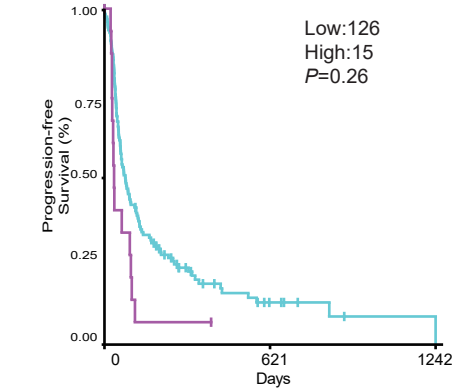

Supplement: 13148_2020_907_MOESM5_ESM.pdf [file 13148_2020_907_MOESM5_ESM.pdf]
